# Supplementary material
Source: bioRxiv or medRxiv preprint supplement (https://medrxiv.org/highwire/filestream/95173/field_highwire_adjunct_files/1/2020.08.31.20185082-2.pdf)
Supplement: Supplementary file [file 2020.08.31.20185082-2.pdf]

| <b>Antibodies</b>                                          | <b>Company</b>             | <b>Reference</b> |
|------------------------------------------------------------|----------------------------|------------------|
| BV 785 mouse anti human CD3 (OKT3) (1/20)                  | BioLegend                  | 317330           |
| BV 711 mouse anti-human CD4 (OKT4) (1/33)                  | BioLegend                  | 317440           |
| PE Cy5 mouse anti-human CD4 (OKT4) (1/50)                  | BioLegend                  | 317412           |
| APC Cy7 mouse anti-human CD8 (SK1) (1/50)                  | BDbiosciences              | 557834           |
| BV 421 mouse anti-human V $\alpha$ 7.2 (3C10) (1/50)       | BioLegend                  | 351716           |
| PE CF594 mouse anti-human TCR $\gamma\delta$ (B1) (1/10)   | BDbiosciences              | 562511           |
| BV 605 mouse anti-human CD161 (HP-3G10) (1/20)             | BioLegend                  | 339916           |
| PE mouse anti-human CCR6 (G034E3) (1/50)                   | BioLegend                  | 353410           |
| PE Cy5 mouse anti-human CD127 (R34.34) (1/10)              | Beckman                    | A64617           |
| BV 510 mouse anti-human CD56 (HCD56) (1/25)                | BioLegend                  | 318340           |
| BV 650 mouse anti-human CD69 (FN50) (1/40)                 | BioLegend                  | 310934           |
| FITC mouse anti-human IFN $\gamma$ (4S B3) (1/10)          | BioLegend                  | 502506           |
| PE rat anti-human IL2 (MQ1-17H12) (1/20)                   | BioLegend                  | 500307           |
| PE Cy7 mouse anti-human IL4 (8D4-8) (1/80)                 | BDbiosciences              | 560672           |
| APC rat anti-human IL10 (JES3-19F1) (1/80)                 | BDbiosciences              | 562036           |
| BV 711 mouse anti-human IL17a (BL168) (1/40)               | BioLegend                  | 512328           |
| BV 510 mouse anti-human Granzyme B (GB11) (1/20)           | BDbiosciences              | 563388           |
| BV 650 mouse anti-human TNF $\alpha$ (MAB11) (1/50)        | BioLegend                  | 502938           |
| BV 421 mouse anti-human CD19 (HIB19) (1/400)               | BioLegend                  | 302234           |
| PE mouse anti-human CD218a (IL-18R $\alpha$ ) (H44) (1/40) | BDbiosciences              | 564675           |
| PE mouse anti-human Isotype control (MOPC-21) (1/20)       | BDbiosciences              | 555749           |
| Human MR1 5-OP-RUPE-labeled Tetramer (1/500)               | NIH Tetramer Core Facility |                  |

**Supplementary Table 2: List of used antibodies**

| <b>Name</b>                   | <b>Forward</b>           | <b>Reverse</b>           |
|-------------------------------|--------------------------|--------------------------|
| <i>18S</i>                    | gtaaccggtgaacccatt       | ccatccaatcggtagtagcg     |
| <i>118</i>                    | gcttgaatctaaattatcagtc   | gaagattcaaattgcatcttat   |
| <i>115</i>                    | aacagaagccaactgggtgaatg  | ctccaagagaaagcacttcattgc |
| <i>118</i>                    | agacagcagagcacacaagc     | atggttcttcgggttgg        |
| <i>116</i>                    | gcccagctatgaactcctct     | gaaggcagcaggcaacac       |
| <i>111<math>\beta</math></i>  | acagatgaagtgtccttcca     | gtcggagattcgtagctggat    |
| <i>1fn<math>\beta</math></i>  | cagcaatttcagtgtcagaagc   | tcatcctgtccttgaggcagt    |
| <i>1fn<math>\alpha</math></i> | gtgaggaataactccaagaatcac | tctcatgatttctgcttgacaa   |
| <i>117</i>                    | gacagcatgaaagaattggtagc  | caactgagcagcagcaggaat    |
| <i>1110</i>                   | tctccgagatgccttcagcaga   | tcagacaaggcttgcaacca     |
| <i>1112p40</i>                | tgccttcaccactcccaaaacc   | caatctctcagaagtgaaggg    |

**Supplementary Table 3:** List of used qPCR primers
